# Supplementary material for: New Acylglycosides Flavones from Fuzhuan Brick Tea and Simulation Analysis of Their Bioactive Effects
Source: PubMed Central journal article supplement (PMC6387181; doi:10.3390/ijms20030494), 2019-01-24

# Supplemental materials

**Figure S1.** The detailed data of isolated compounds with high purity identified by NMR and TOF-MS depicted as followed:

## Compound 1

### $^{13}\text{C-NMR}$

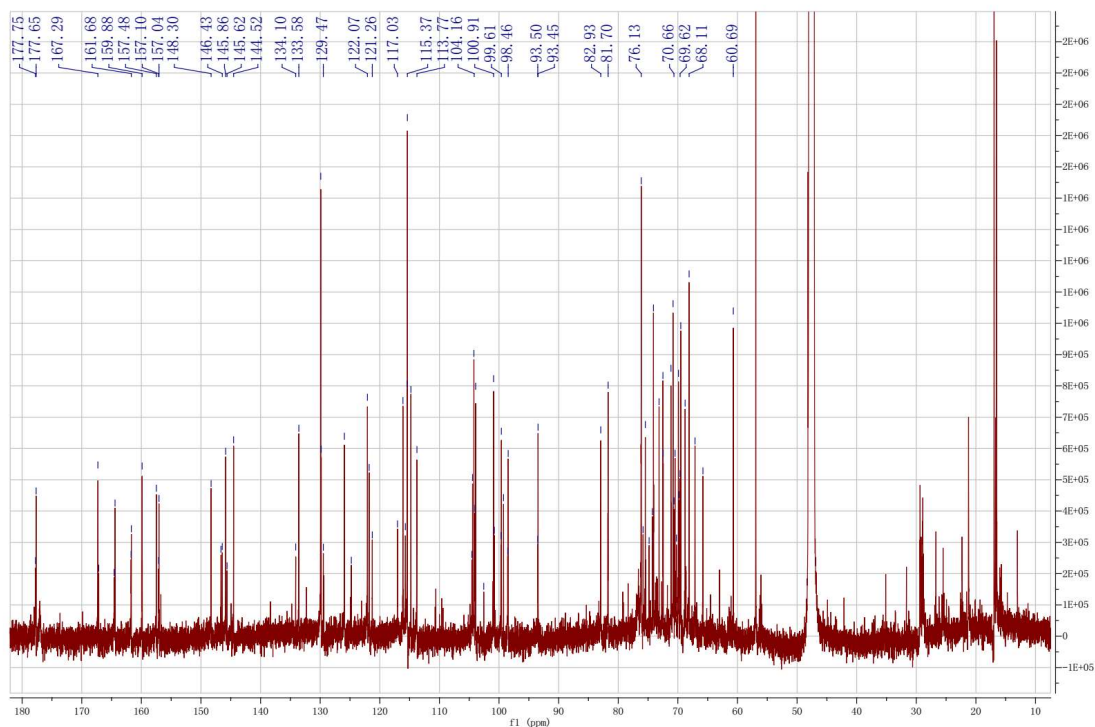

### $^1\text{H-NMR}$

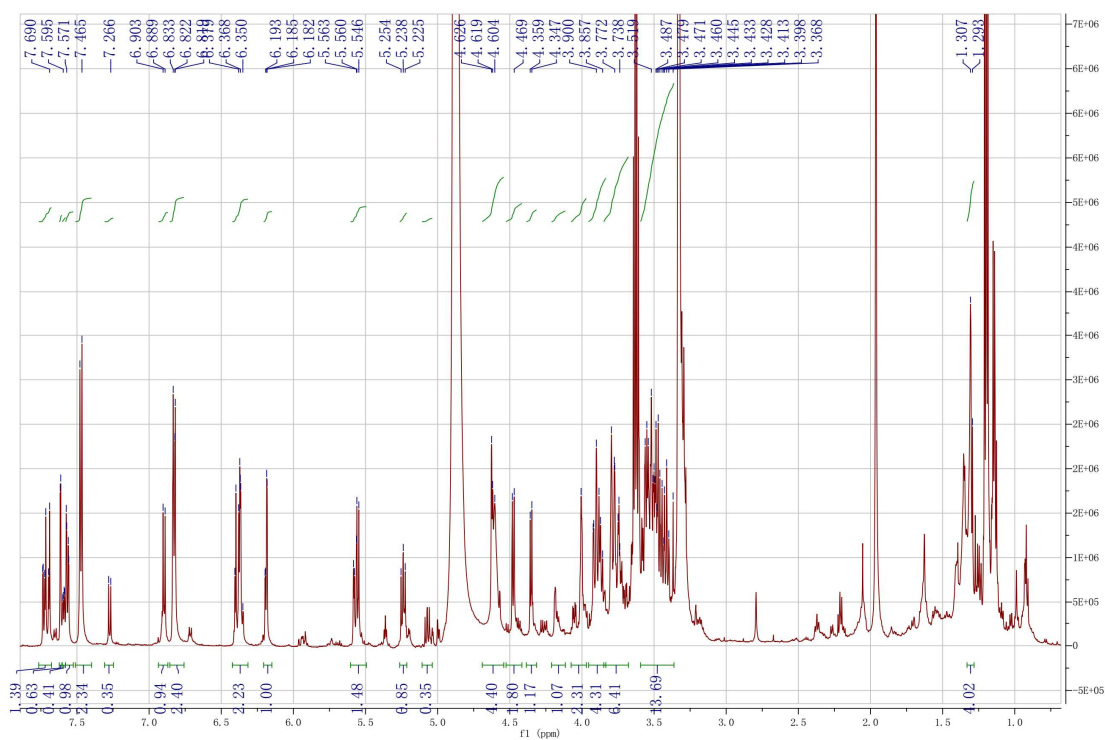

# H-H COSY

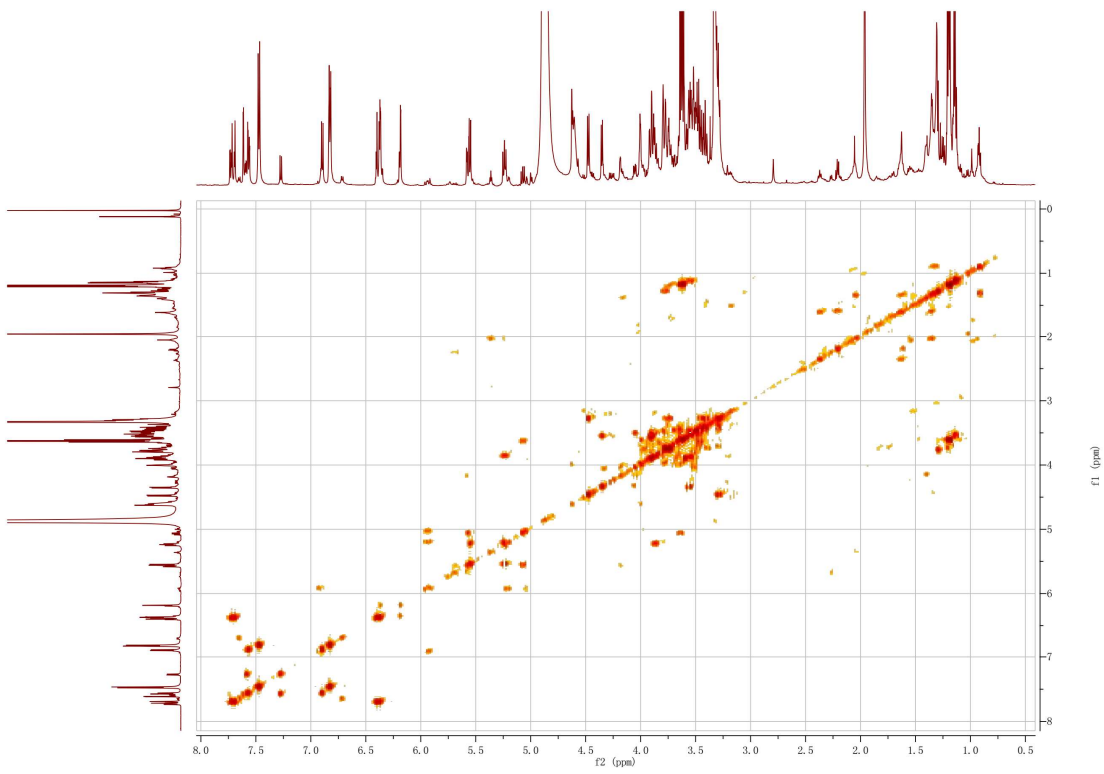

# HMBC

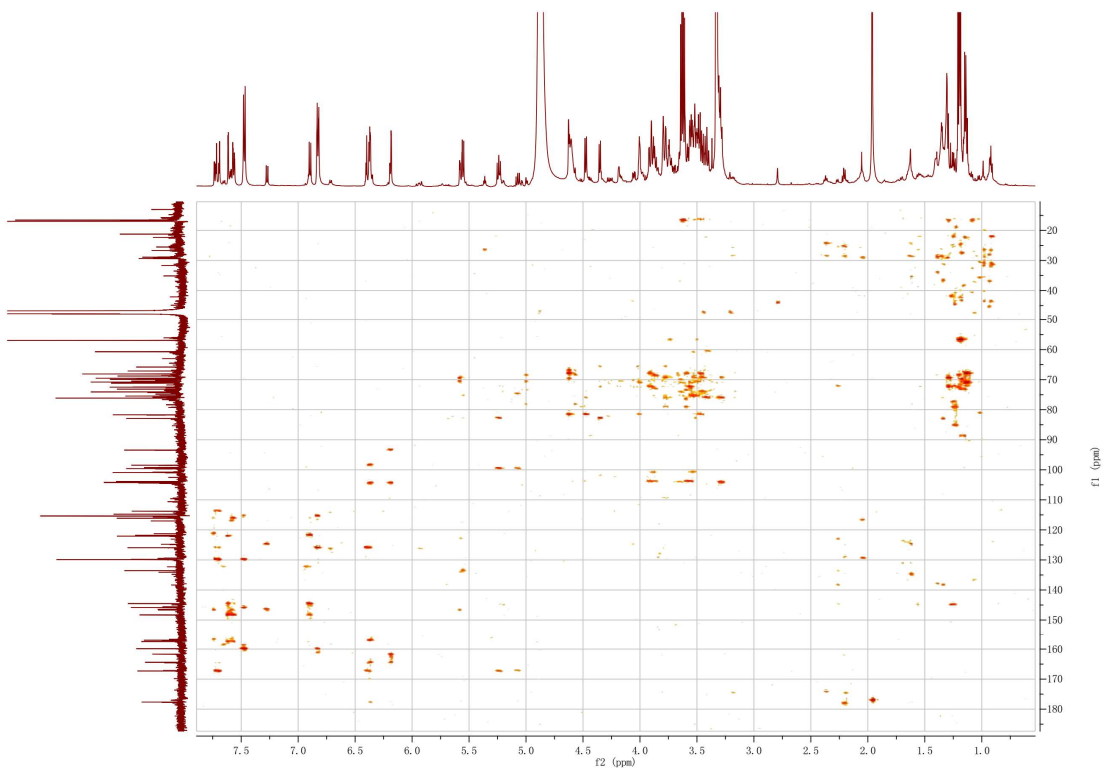

# HSQC

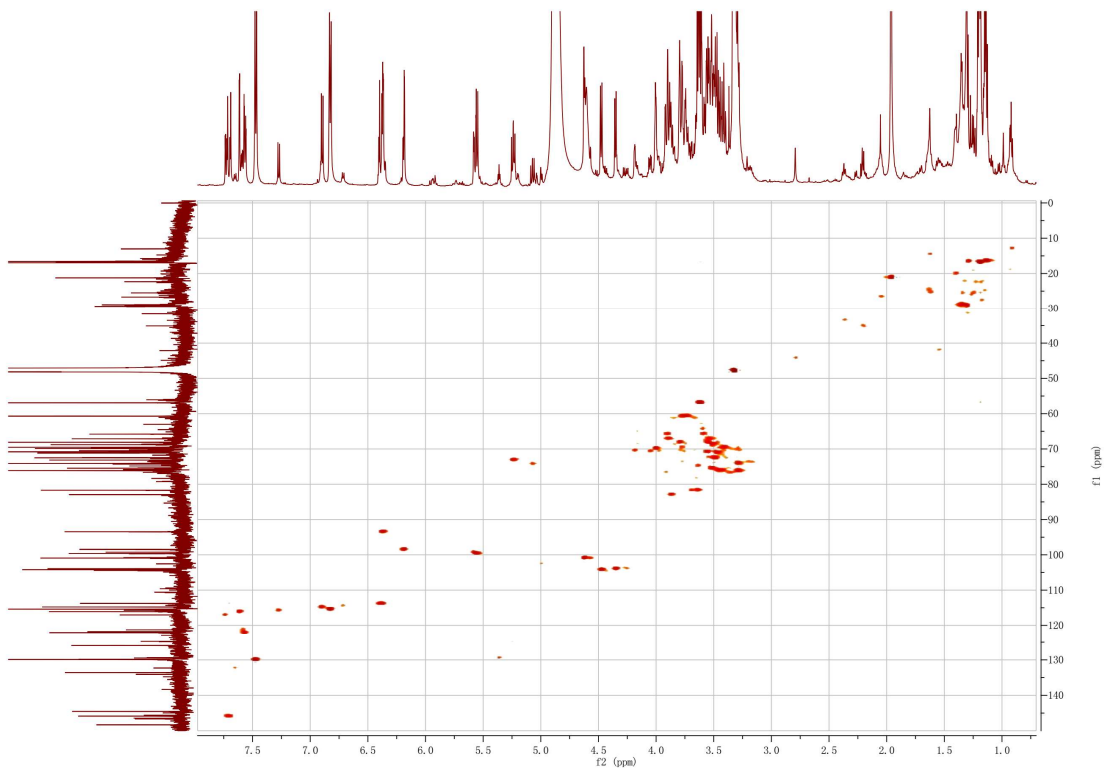

# MS

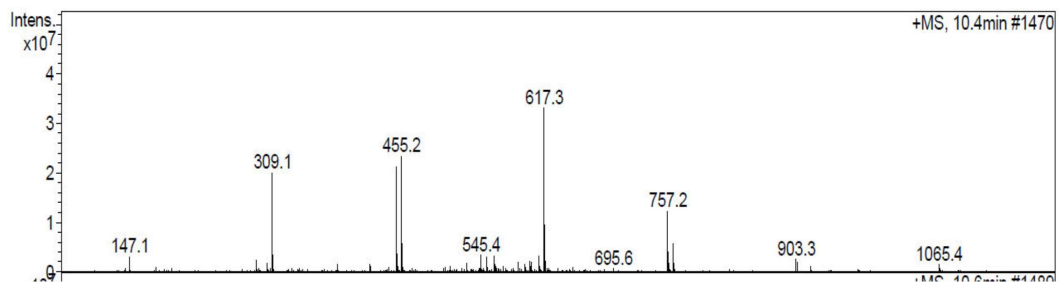

# Compound 2

## <sup>13</sup>C-NMR

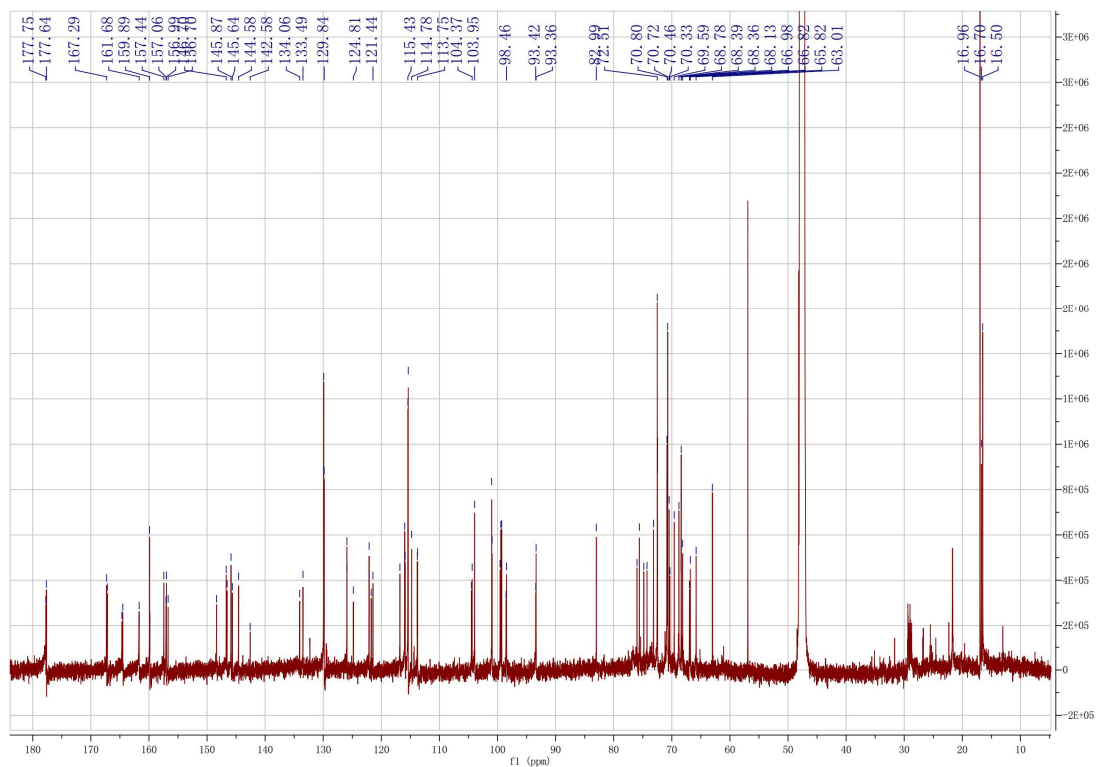

## <sup>1</sup>H-NMR

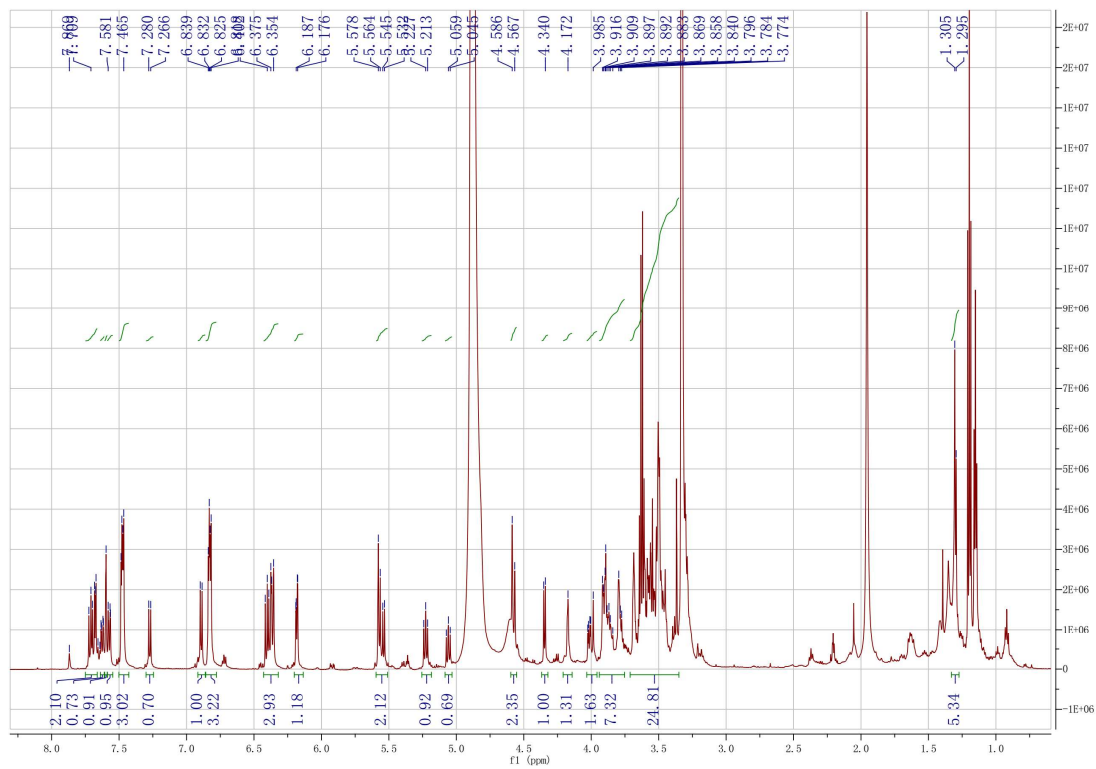

# H-H COSY

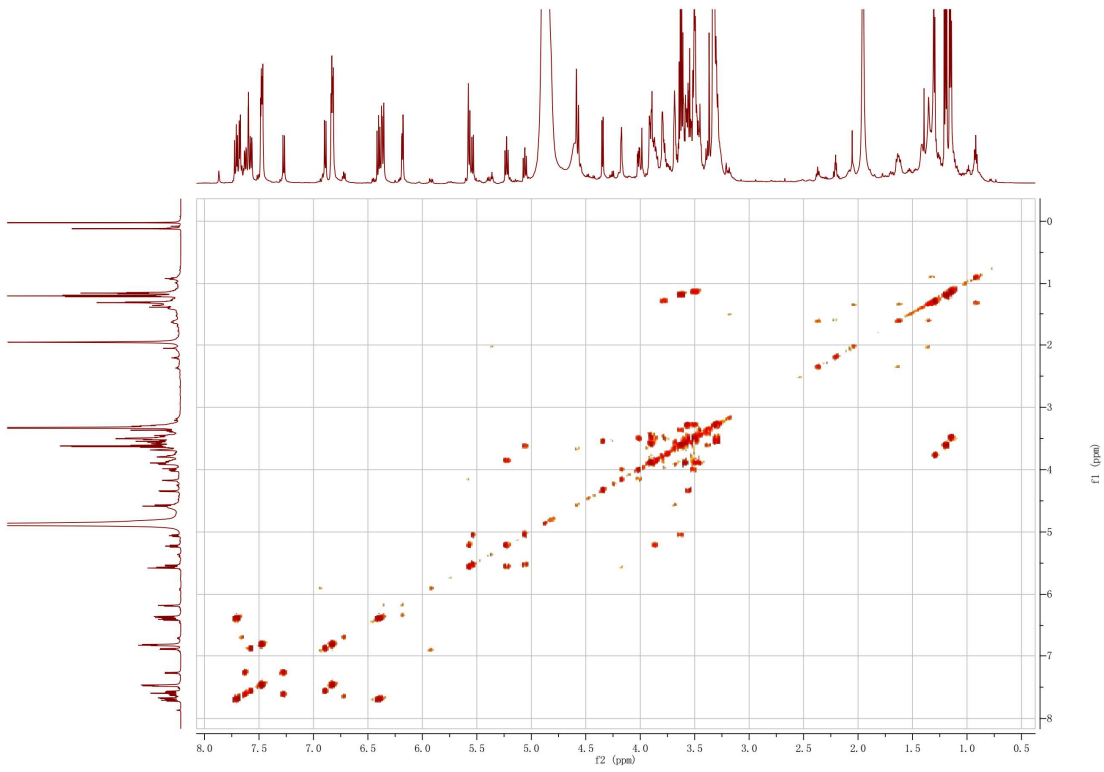

# HMBC

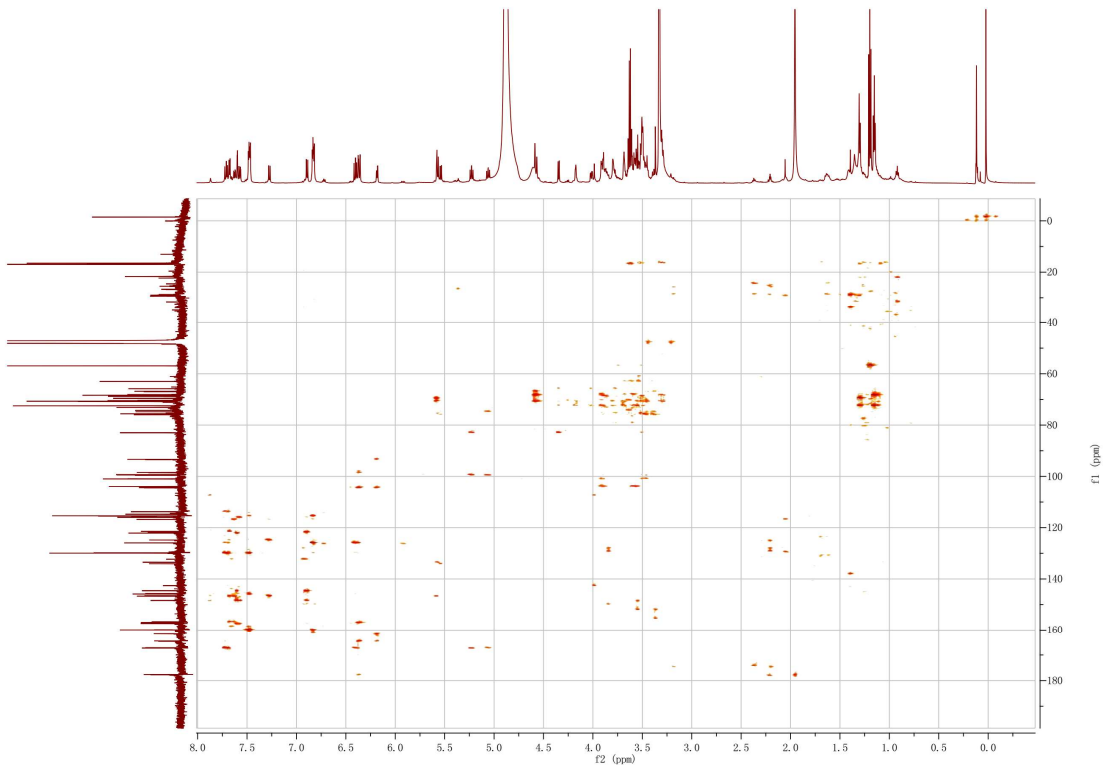

# HSQC

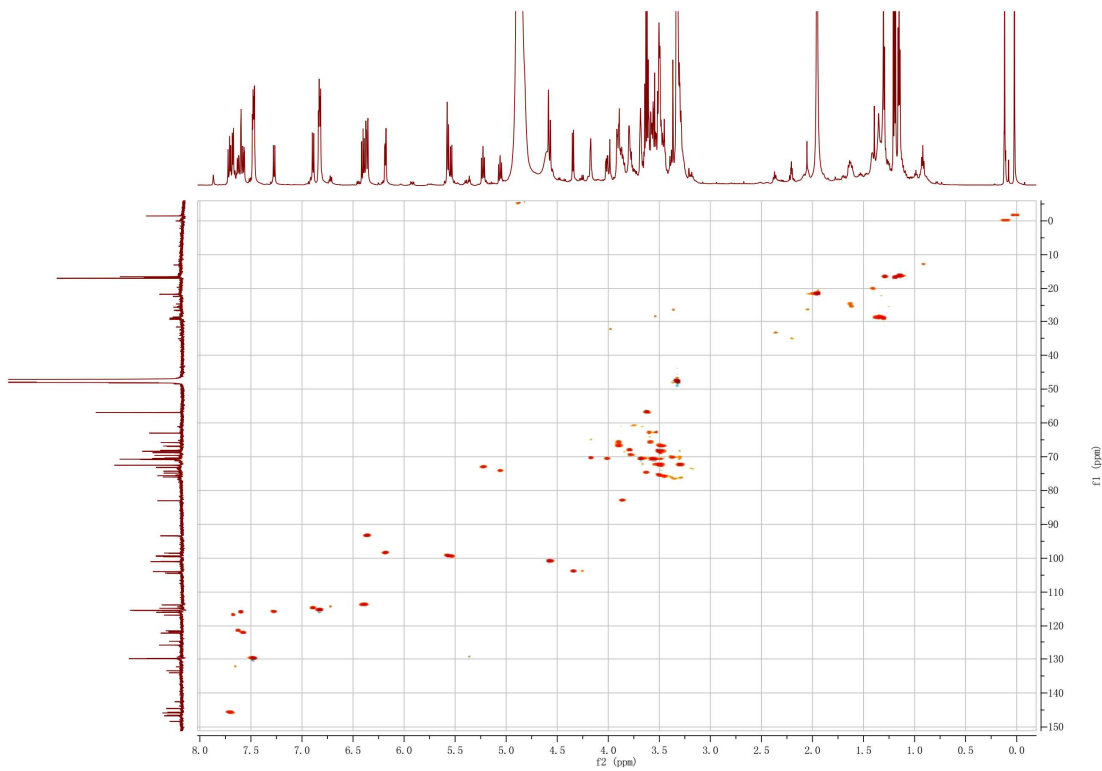

# MS

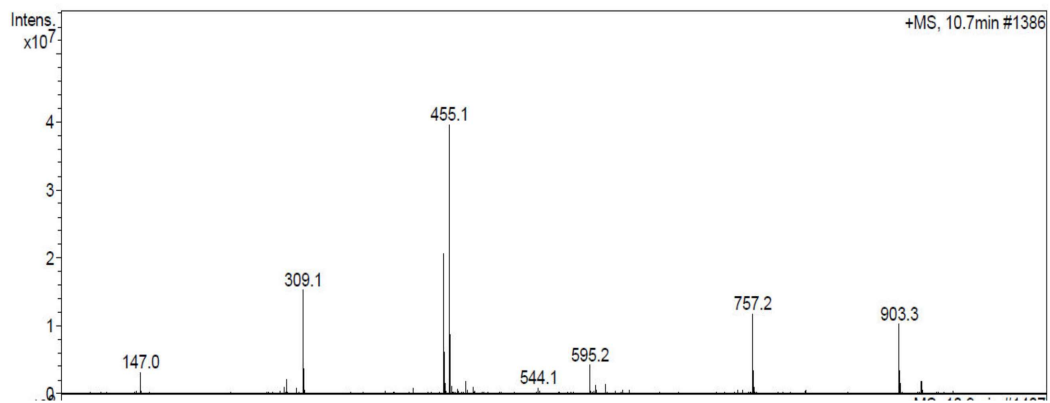

# Compound 3

## <sup>13</sup>C-NMR

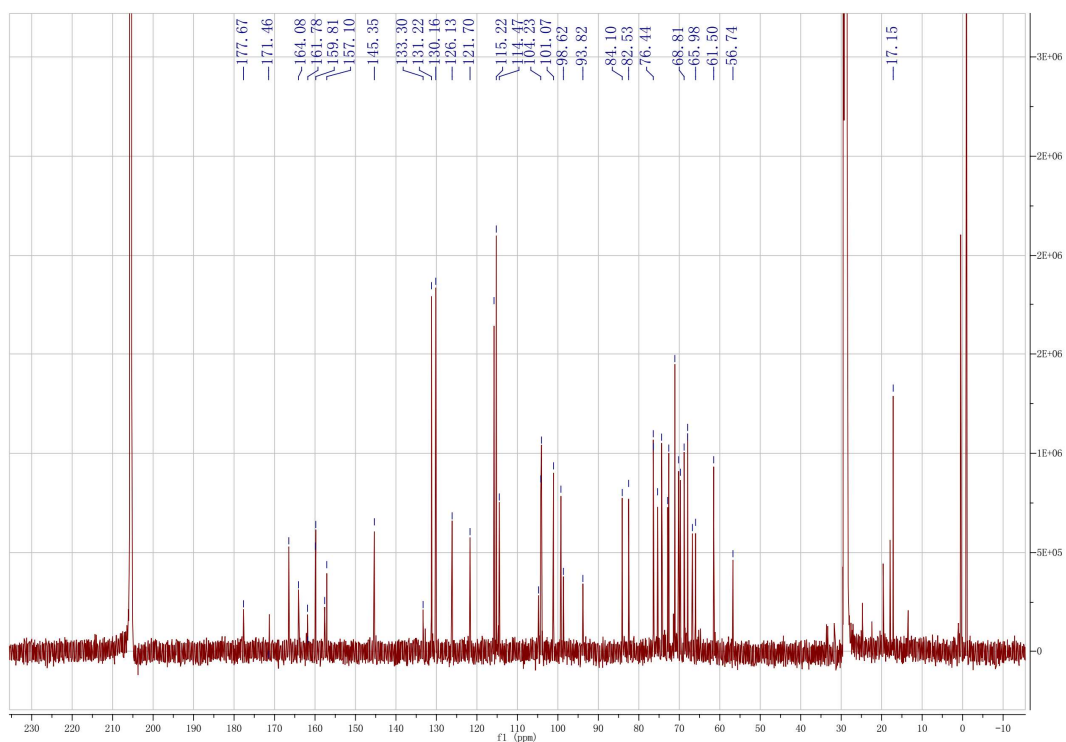

## <sup>1</sup>H-NMR

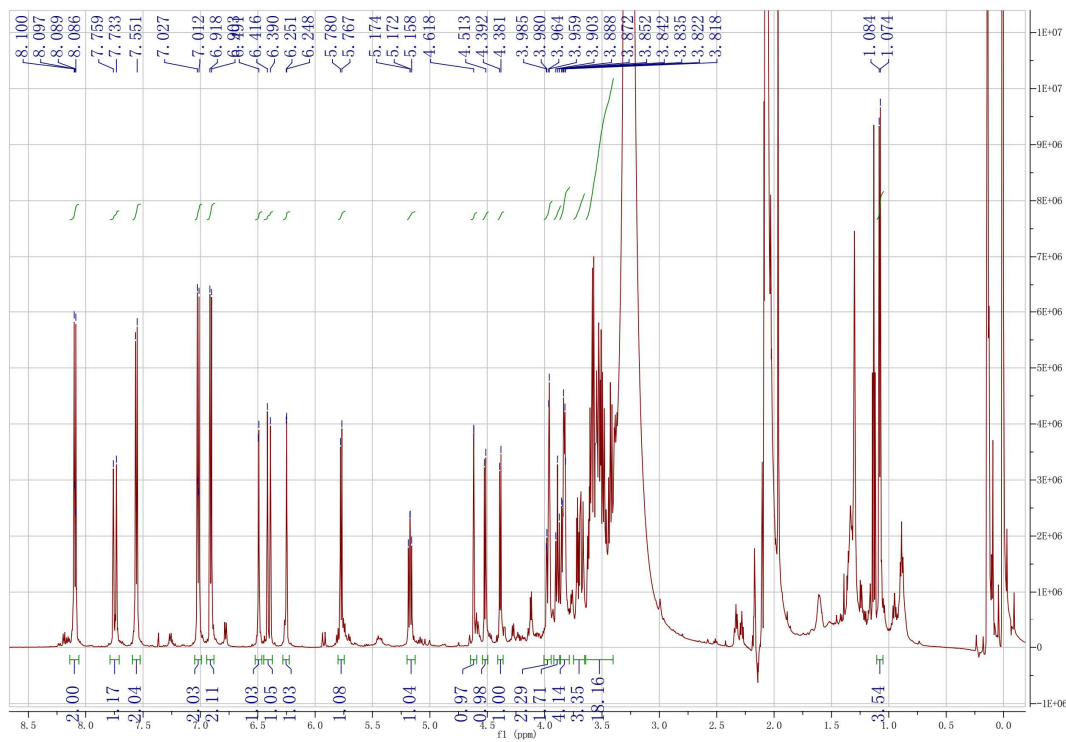

# H-H COSY

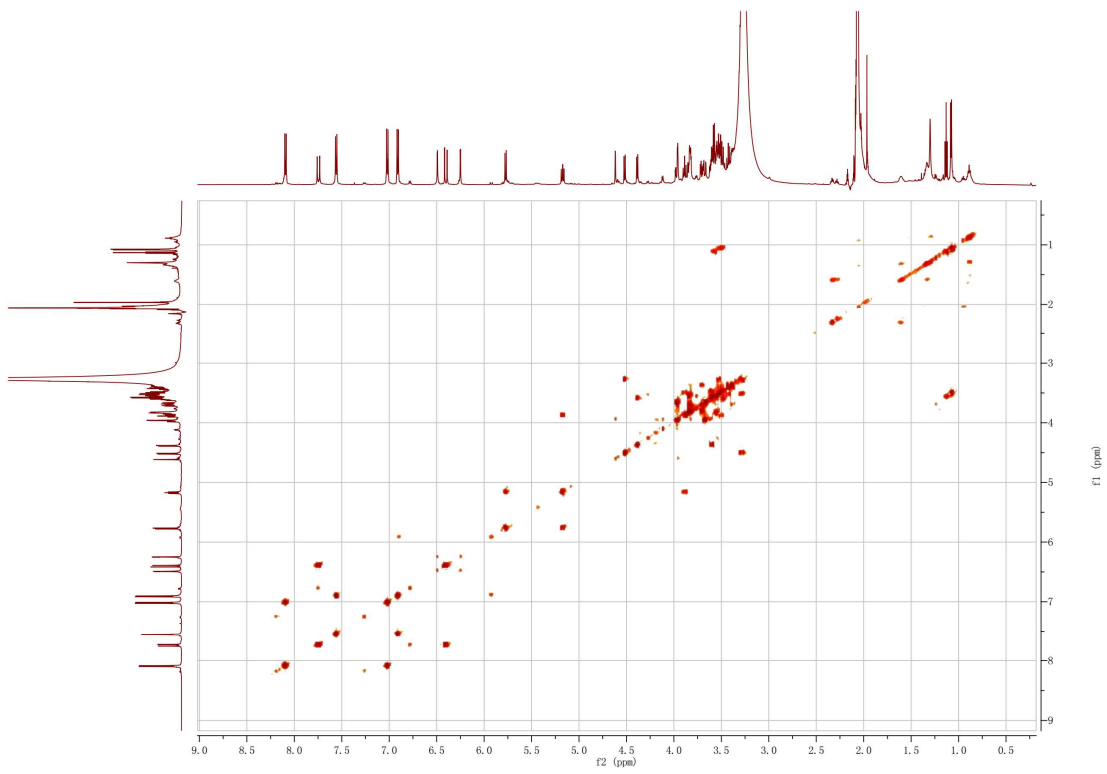

# HMBC

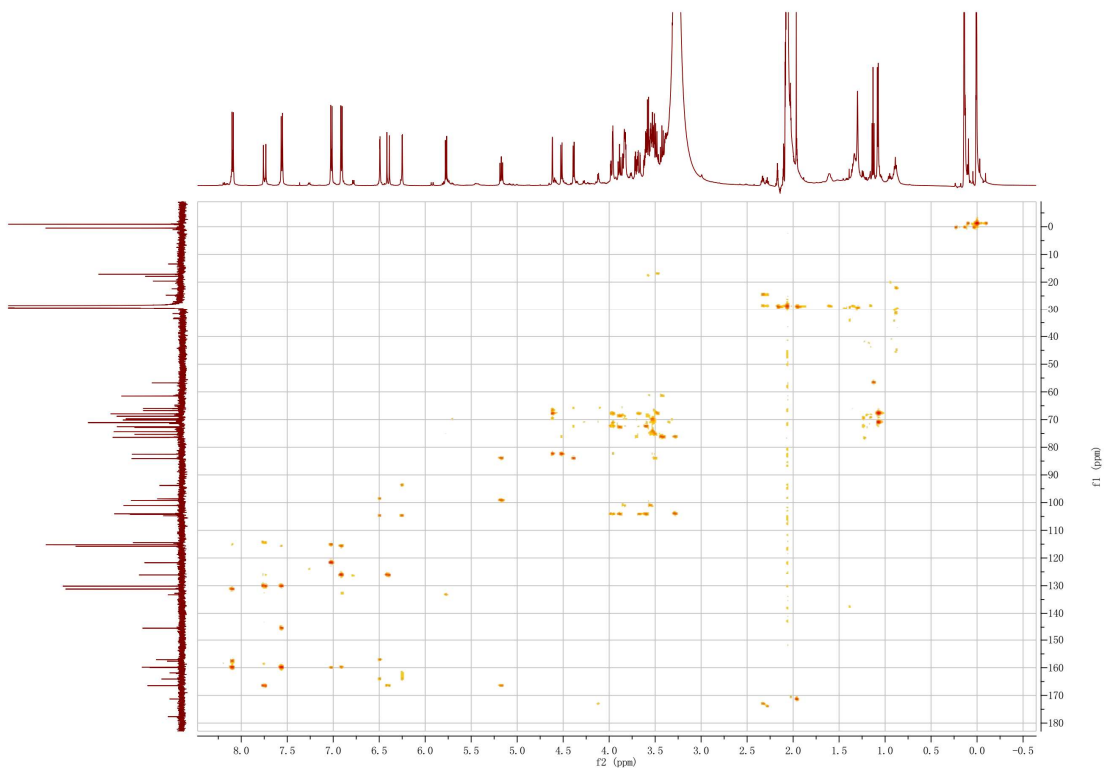



# HSQC

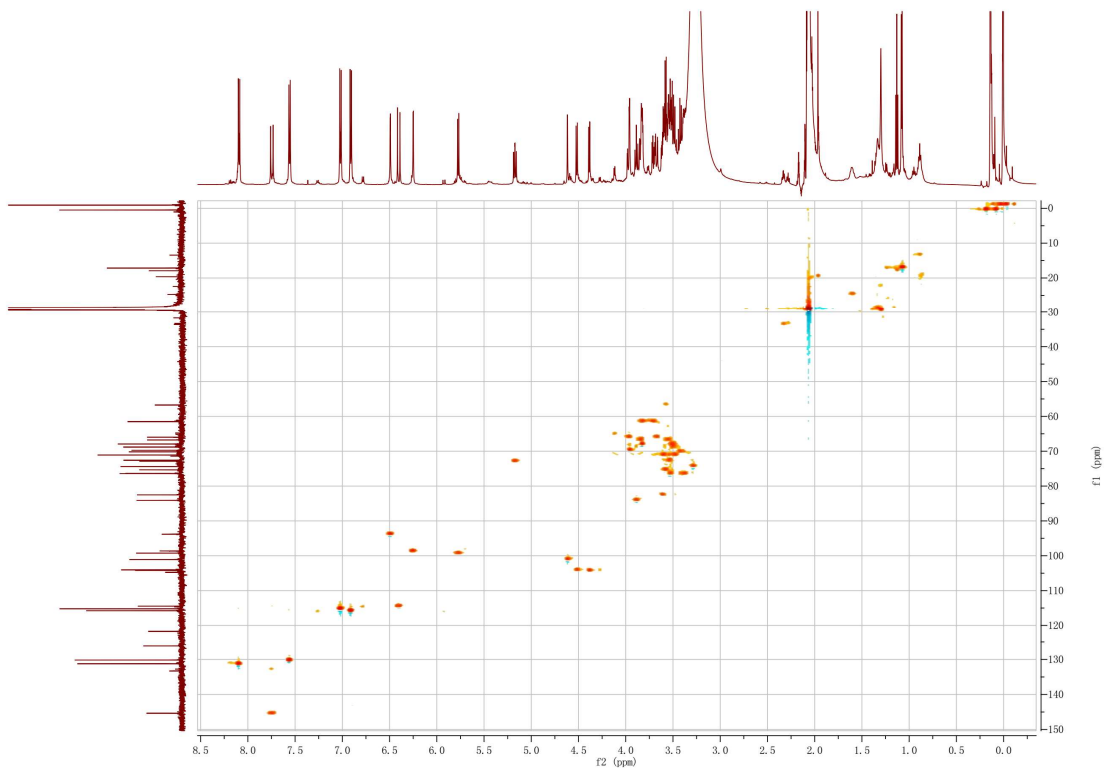

# MS

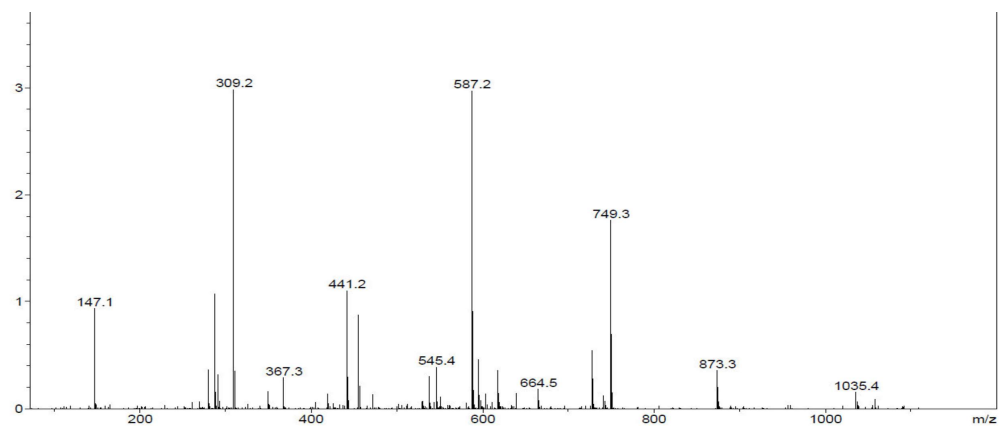

# Compound 4

## <sup>13</sup>C-NMR

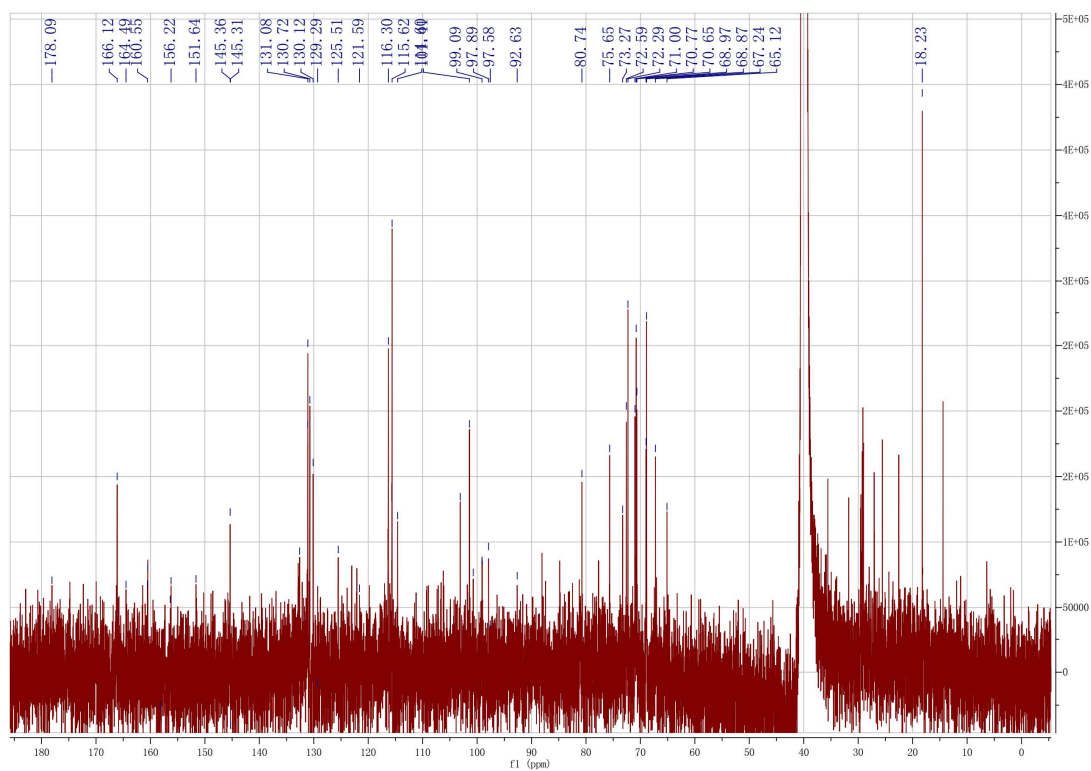

## <sup>1</sup>H-NMR

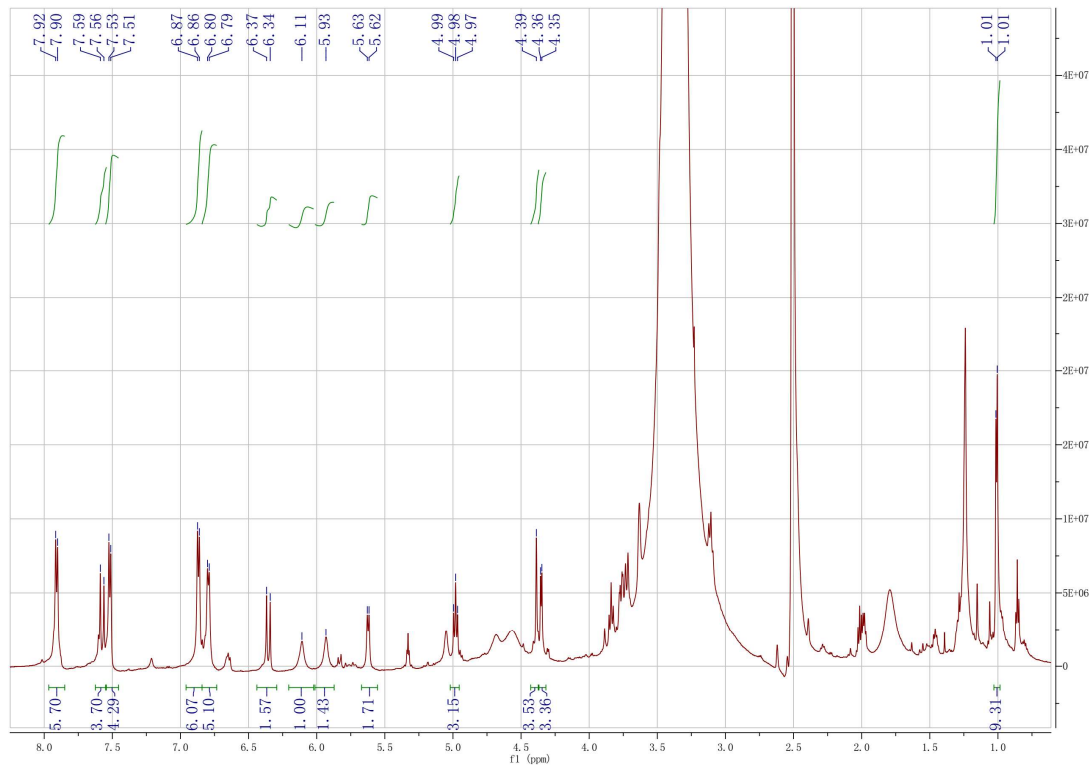

# H-H COSY

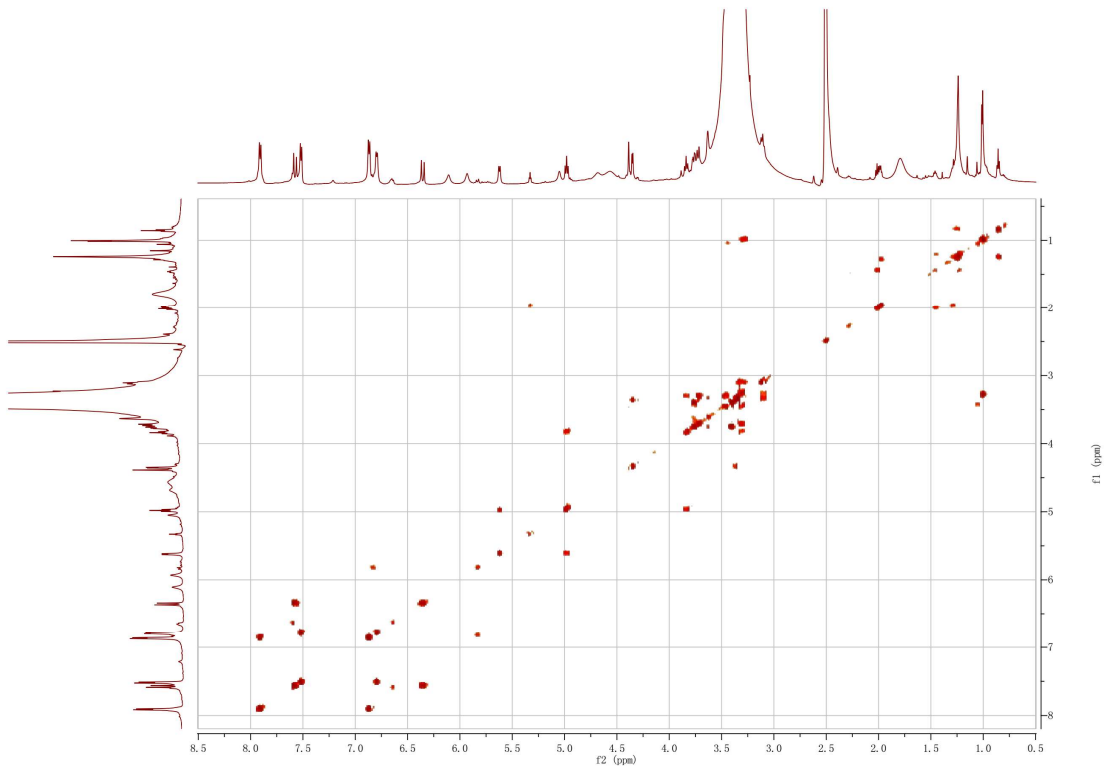

# HMBC

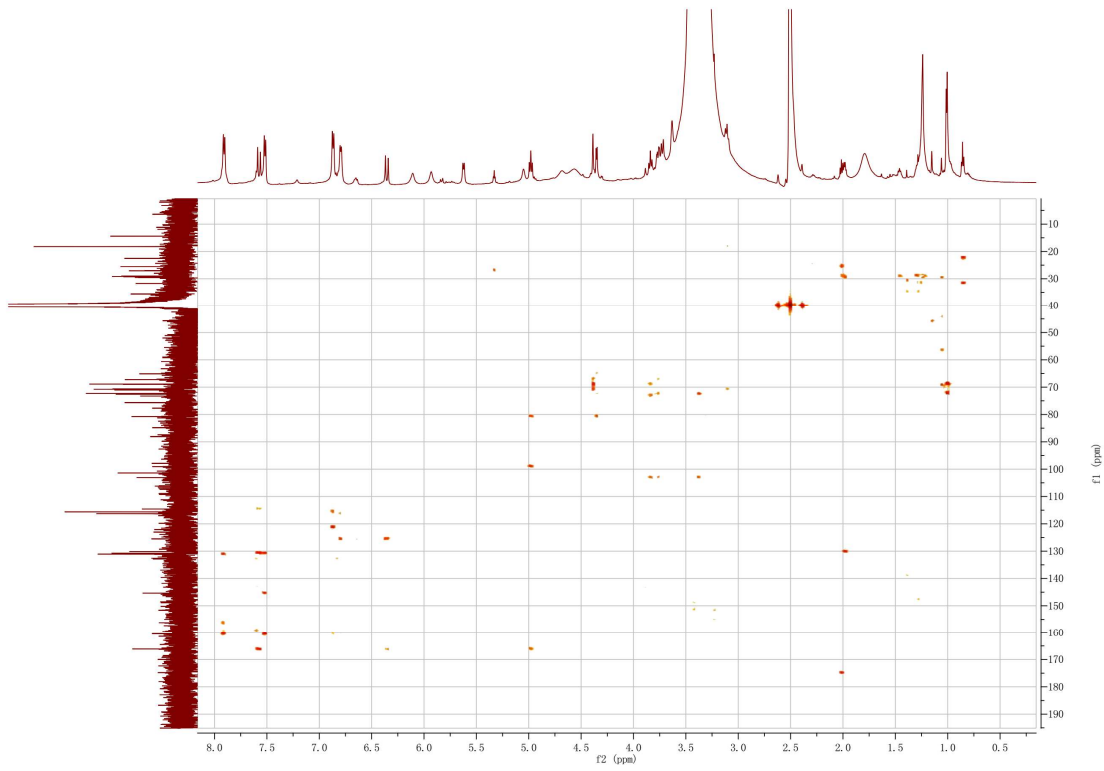

# HSQC

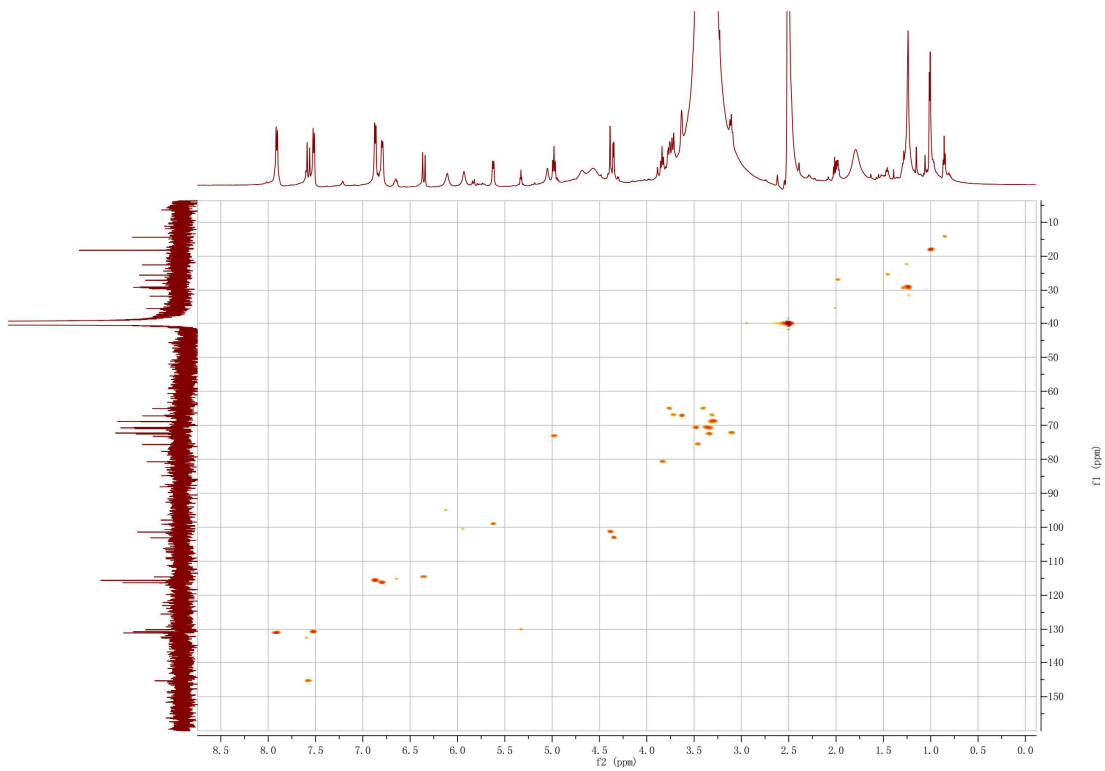

# MS

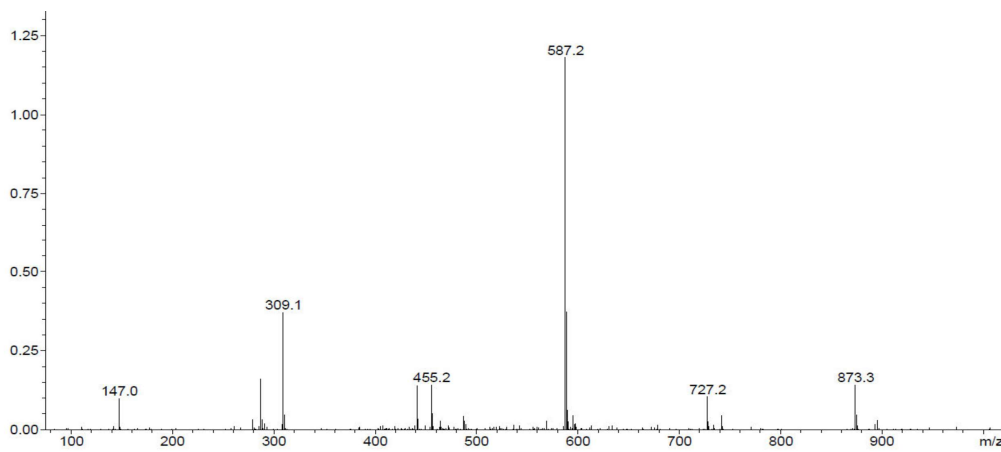

Supplement: ijms-20-00494-s001.pdf [file ijms-20-00494-s001.pdf]
